# Supplementary material for: Hydroxylation of silica nanoclusters (SiO2)M(H2O)N, M = 4, 8, 16, 24: stability and structural trends
Source: Royal Society of Chemistry journal article supplement (doi:10.1039/c3cp53347f), 2013-01-01
Supplement: c3cp53347f.pdf [file c3cp53347f.pdf]

## Supplementary Information:

### Hydroxylation of silica nanoclusters $(\text{SiO}_2)_M(\text{H}_2\text{O})_N$ $M=4, 8, 16, 24$ : stability and structural trends

Kim E. Jelfs,<sup>a</sup> Edwin Flikkema<sup>b</sup> and Stefan T. Bromley<sup>c,d\*</sup>

<sup>a</sup> Department of Chemistry, University of Liverpool, Crown Street, Liverpool, L69 7ZD, UK;

<sup>b</sup> Institute of Mathematics and Physics, Penglais, Aberystwyth, Ceredigion, SY23 3BZ, UK;

<sup>c</sup> Department de Química Física & Institut de Química Teòrica i Computacional, Universitat de Barcelona, C/ Martí i Franquès 1, E-08028 Barcelona, Spain;

<sup>d</sup> Institució Catalana de Recerca i Estudis Avançats (ICREA), E-08010 Barcelona, Spain. E-mail: s.bromley@ub.edu

1. Linear fits to the open data points in Figure 3.

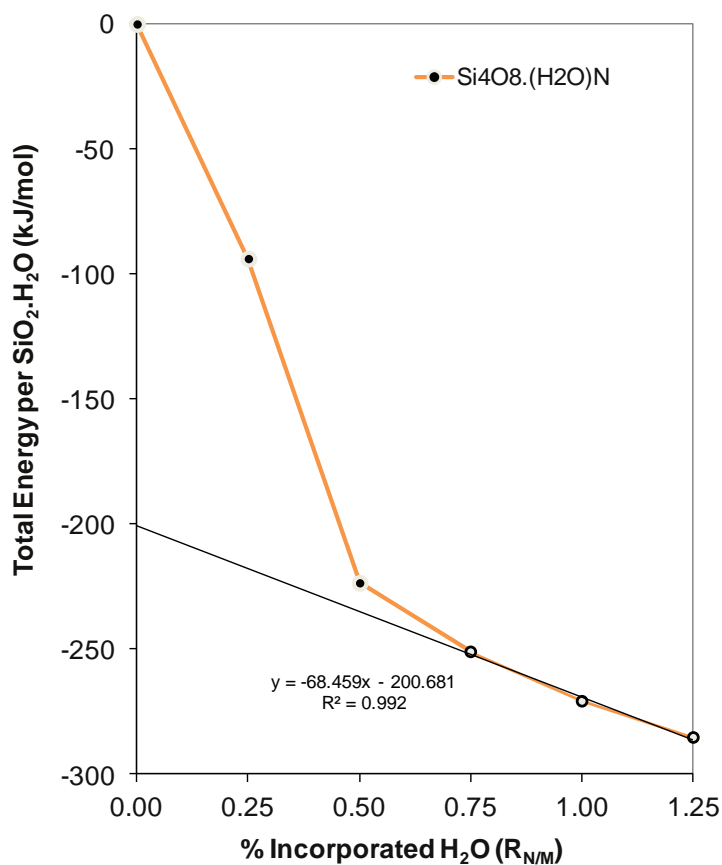

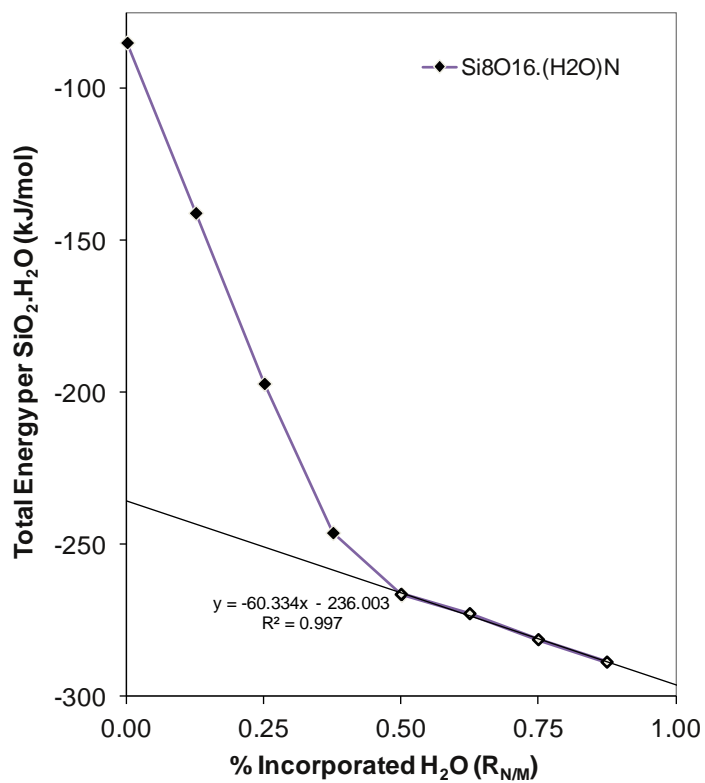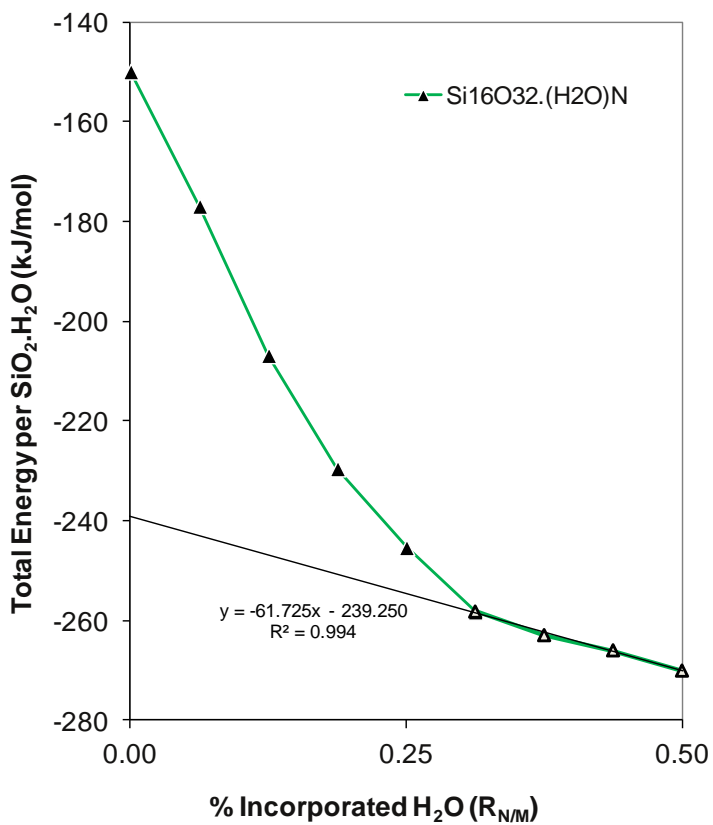

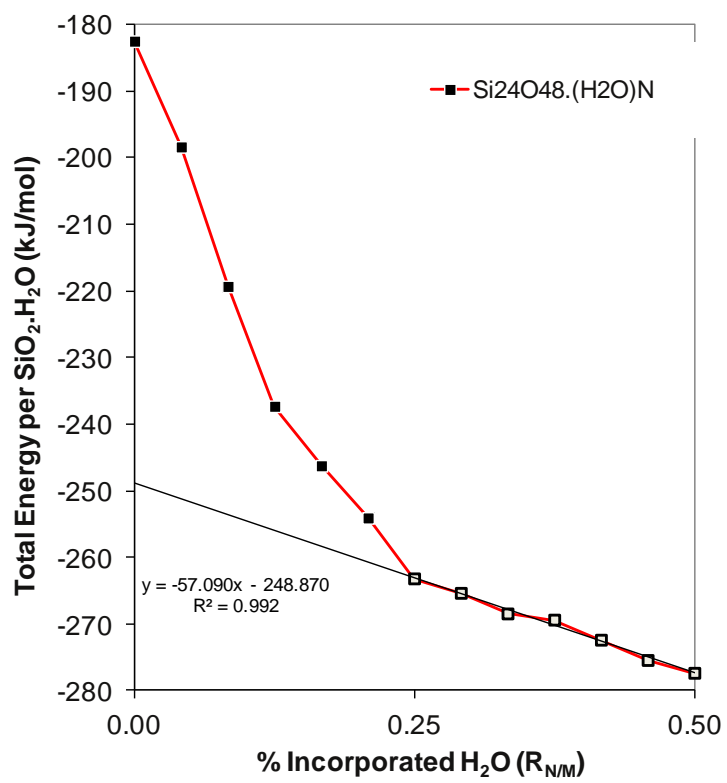

2. Structures of the lowest energy  $R_{N/M}=0.5$  cage-like clusters found for  $M=16$  (left) and 24 (right).

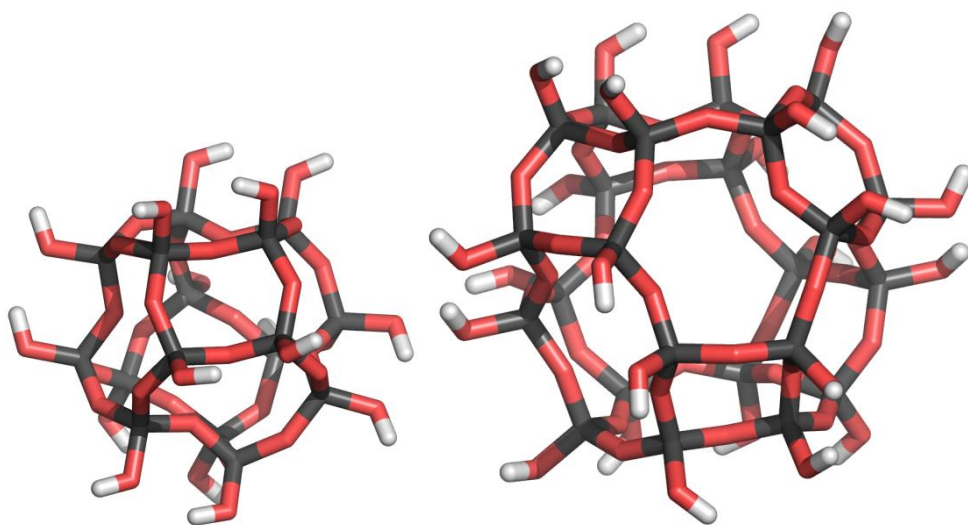

3. Structures of the lowest energy  $(\text{SiO}_2)_4(\text{H}_2\text{O})_N$  and  $(\text{SiO}_2)_8(\text{H}_2\text{O})_N$  clusters found for  $R_{N/M} \geq 0.5$ .

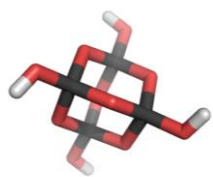

$(\text{SiO}_2)_4(\text{H}_2\text{O})_2$   
 $R_{N/M}=0.5$

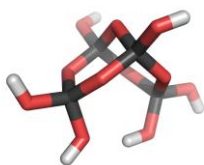

$(\text{SiO}_2)_4(\text{H}_2\text{O})_3$   
 $R_{N/M}=0.75$

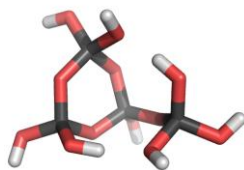

$(\text{SiO}_2)_4(\text{H}_2\text{O})_4$   
 $R_{N/M}=1.0$

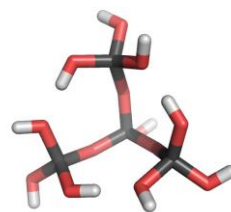

$(\text{SiO}_2)_4(\text{H}_2\text{O})_5$   
 $R_{N/M}=1.25$

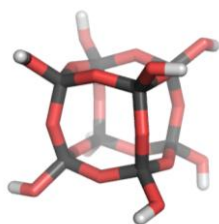

$(\text{SiO}_2)_8(\text{H}_2\text{O})_4$   
 $R_{N/M}=0.5$

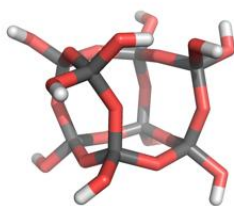

$(\text{SiO}_2)_8(\text{H}_2\text{O})_5$   
 $R_{N/M}=0.625$

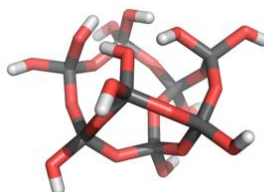

$(\text{SiO}_2)_8(\text{H}_2\text{O})_6$   
 $R_{N/M}=0.75$

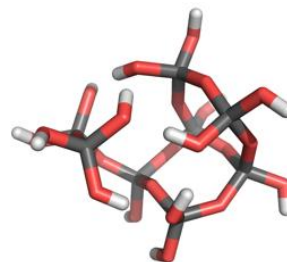

$(\text{SiO}_2)_8(\text{H}_2\text{O})_7$   
 $R_{N/M}=0.875$
